# Supplementary material
Source: PubMed Central journal article supplement (PMC6610610)
Supplement: Supplemental_Figures.pdf [file Supplemental_Figures.pdf]

Supplemental Figures

**AGP Report**

Name \_\_\_\_\_

MRN \_\_\_\_\_

**GLUCOSE STATISTICS AND TARGETS**

|                                           |                  |
|-------------------------------------------|------------------|
| <b>27 Feb 2019 - 11 Mar 2019</b>          | <b>13 days</b>   |
| <b>% Time CGM is Active</b>               | <b>99.9%</b>     |
| <b>Average Glucose</b>                    | <b>173 mg/dL</b> |
| <b>Glucose Management Indicator (GMI)</b> | <b>7.6%</b>      |
| <b>Glucose Variability</b>                | <b>49.5%</b>     |

Defined as percent coefficient of variation (%CV); target  $\leq 36\%$

**TIME IN RANGES**

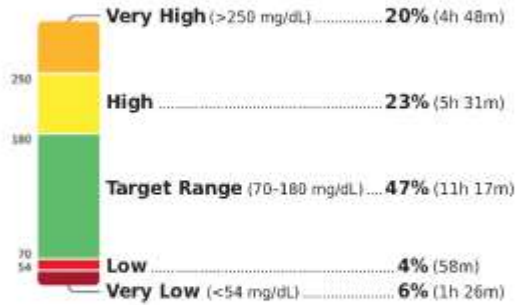

**AMBULATORY GLUCOSE PROFILE (AGP)**

AGP is a summary of glucose values from the report period, with median (50%) and other percentiles shown as if occurring in a single day.

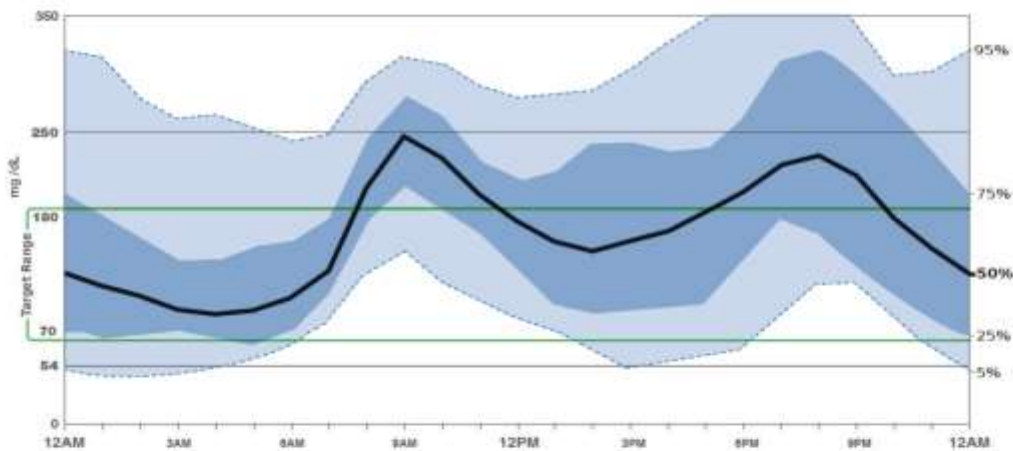

**DAILY GLUCOSE PROFILES**

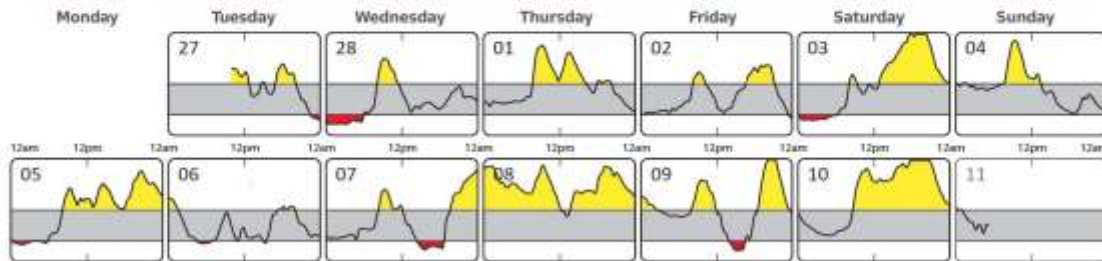

Each daily profile represents a midnight to midnight period.

© 2019 International Diabetes Center at Fairview

capturAGP®

Figure 1S. Ambulatory Glucose Profile

## Supplemental Figures

# Medtronic

## CareLink™ Personal

Welcome to the CareLink™ Personal Therapy Management Software for Diabetes. This Web-based system is designed to help you take information from all of your diabetes management tools – your insulin pump, continuous glucose monitor, blood glucose meter(s), and logbook – and organize it into easy-to-read charts, graphs and tables. These reports can help you and your healthcare provider discover trends and other information that can lead to improved therapy management for greater control.

**Features of the CareLink Personal Software:**

- **Personal treatment reports with the information you need**
- **Getting Started Guide**

**NEW way to upload without Java!**

See an overview at [MedtronicDiabetes.com/CareLink-Info](http://MedtronicDiabetes.com/CareLink-Info) with guides and videos to help you with 1) install and 2) uploads. For further assistance, see the support page at [MedtronicDiabetes.com/Customer-Support/CareLink-Personal](http://MedtronicDiabetes.com/Customer-Support/CareLink-Personal).

[Change country/language](#)

**Now everything is at your fingertips. Start today.**

**Sign Up Now**

**Already a member? Sign In Here:**

Username

Password

**Sign In** [Forgot your password?](#)

**Other Resources:**

- [What You Need to Get Started](#)
- [How to Set Up Your Account](#)
- [myLearning Instructional Video](#)

Figure 2S. CareLink Personal Log-In Interface

# Medtronic

## CareLink™ Personal

[My Info](#) [Preferences](#) [Help](#) [Log-Off](#)

**Home** **Reports** **CareLink Connect**

**1. Select period:** **2 weeks** 1 month 3 months Custom

09/08/2018 – 09/21/2018

**2. Select reports:** Total = 0 report(s) **Generate Reports**

**Bundles**

- Bundled reports for my progress and trends**  
(more details...)  
I would like to know the patterns of my glucose control. I want to see average glucose and total insulin used per day. **+** Add to list
- Bundled reports for mealtime glucose levels**  
(more details...)  
I would like to track my meal bolus, glucose level after I eat, and amount of food I am eating. **+** Add to list
- Bundled reports for causes of highs and lows**  
(more details...)  
I would like to know the relationship between activities or events and glucose levels on a day by day basis. **+** Add to list
- Bundled reports for pump and no sensor**  
(more details...)  
**+** Add to list

Figure 3S. CareLink Personal Report Download Interface

## Supplemental Figures

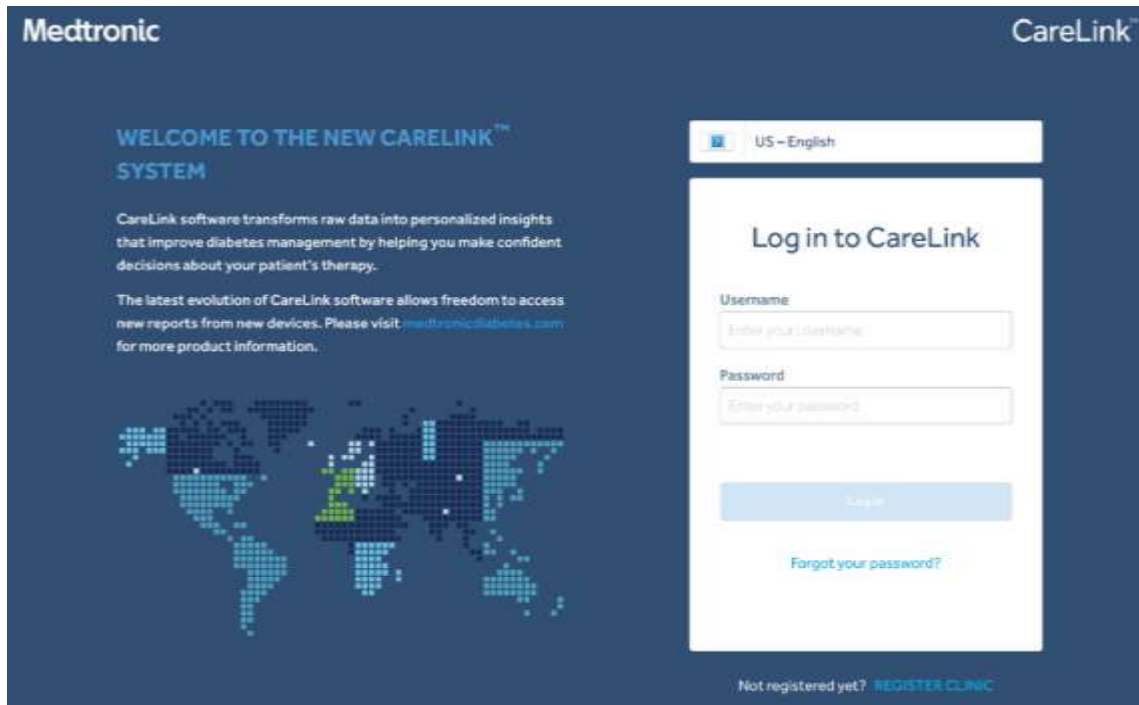

Figure 4S. CareLink Professional Log-In Interface

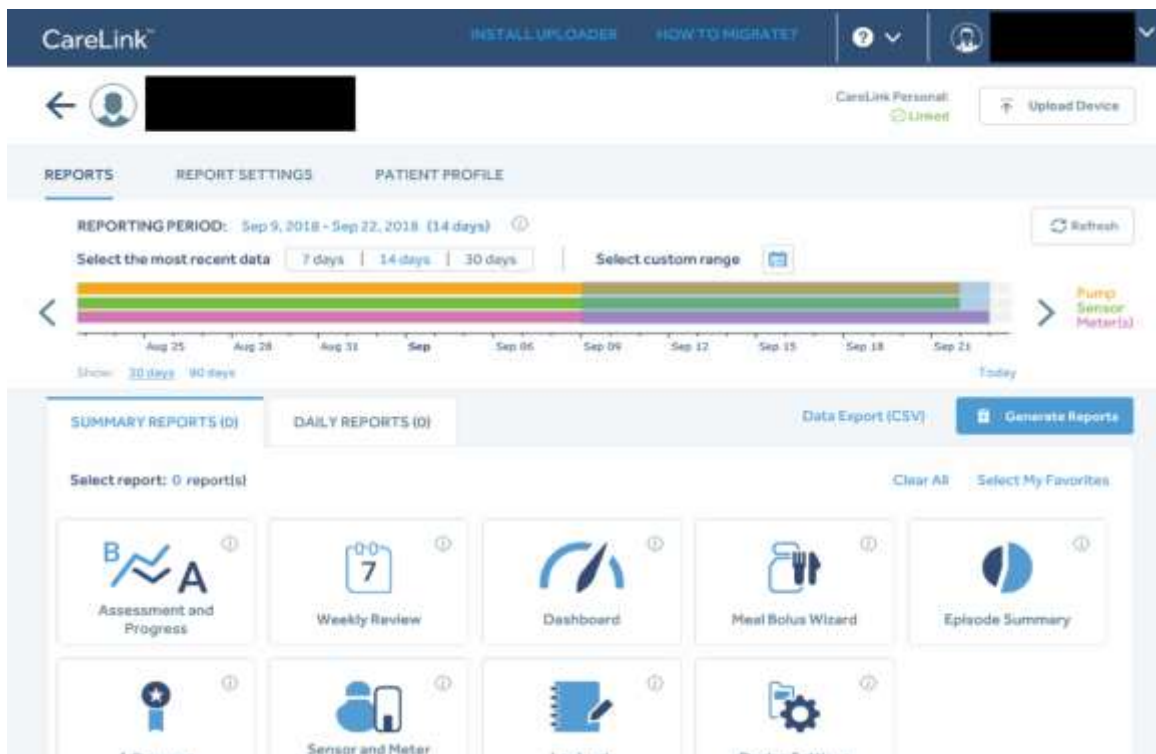

Figure 5S. CareLink Professional Report Download Interface

## Supplemental Figures

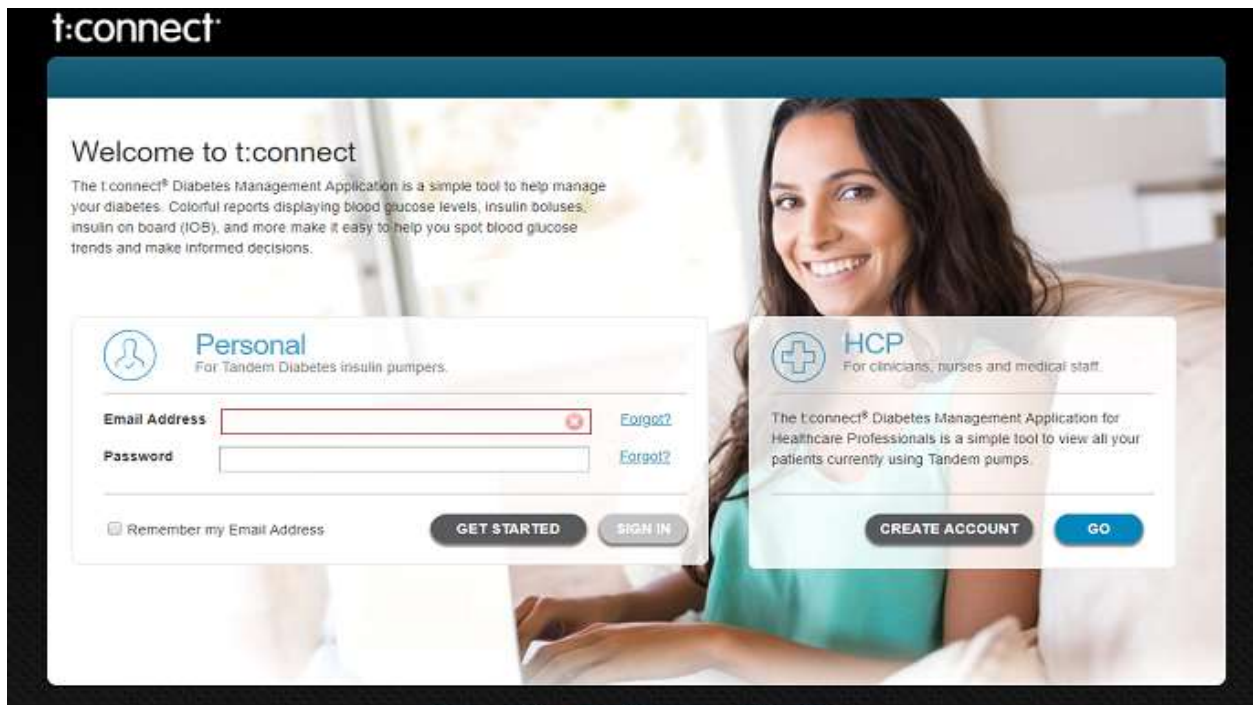

Figure 2S: t:connect Log-In Interface

Figure 6S. t:connect Log-In Interface
